# Supplementary material
Source: PubMed Central journal article supplement (PMC4527487)

**Improving health and viability in  
mitochondrial disease through  
inhibition of cytosolic translation  
and autophagy**

**Peng M. et al.**

**Supplemental Files**

**Fig S1. Effects of RC inhibition, probucol, and nutrients on AMPK activation.**

MOUSE LIVER

MOUSE LIVER

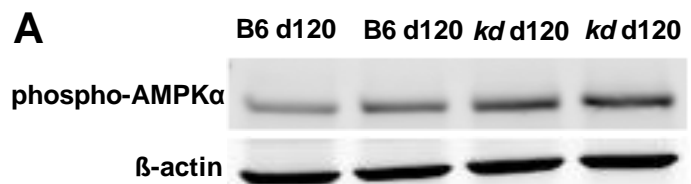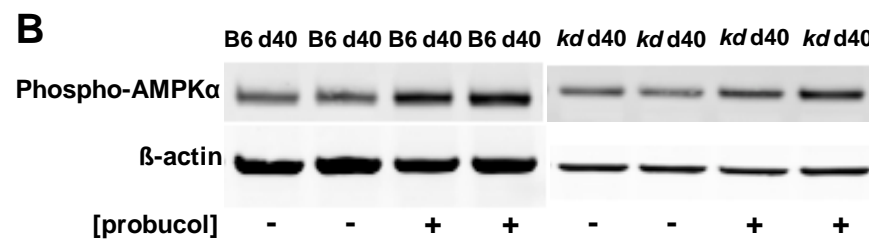

HUMAN PODOCYTES

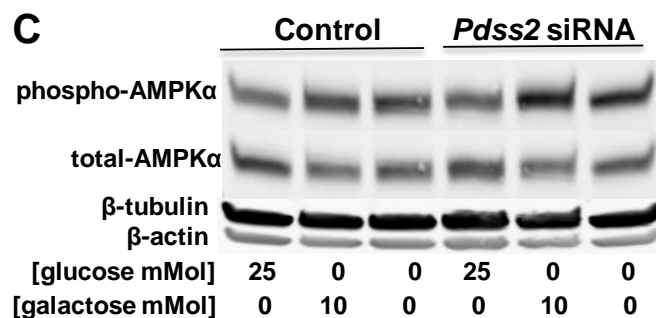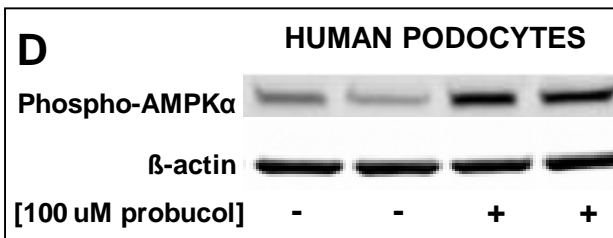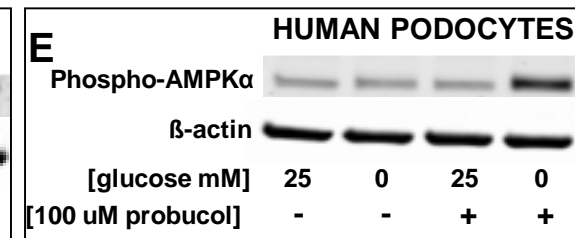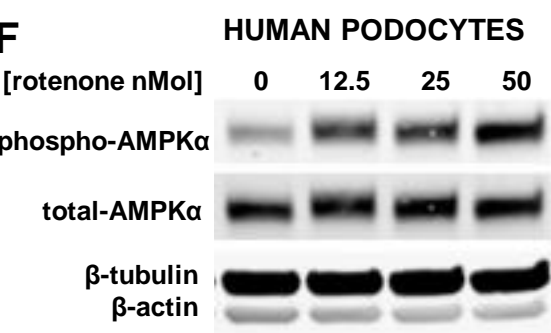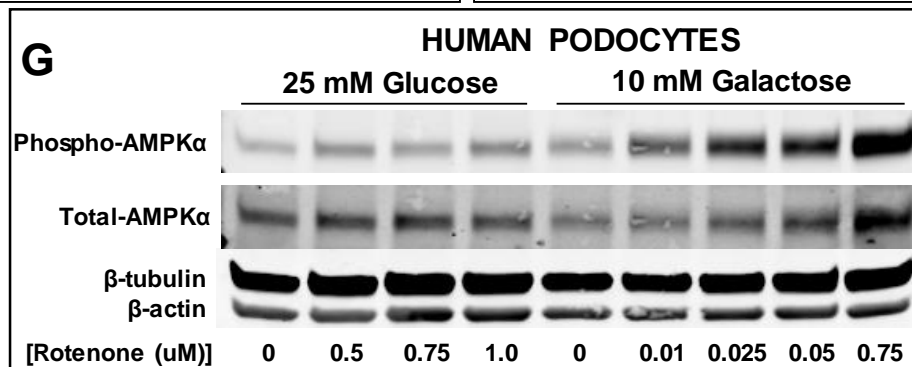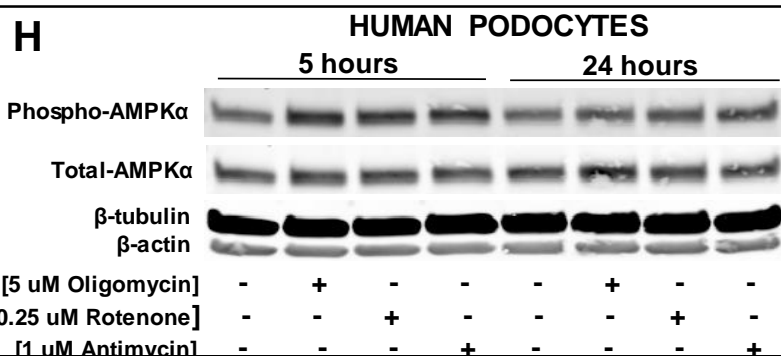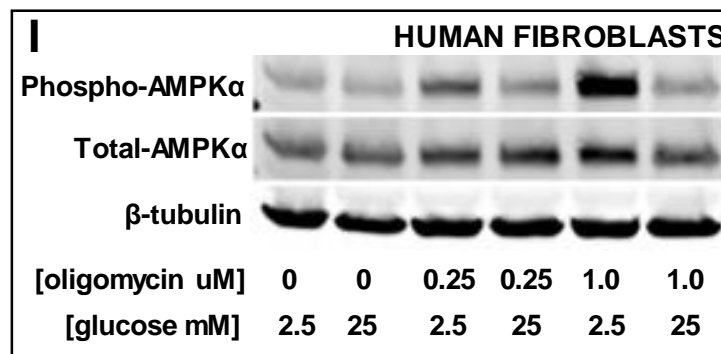

**Table S1. Table of all lifespan results in *C. elegans gas-1(fc21)* worms treated with probucol, rapamycin, and cycloheximide**

| STUDY DRUG    | Concentration | Buffer    | Worm Stage at Treatment Initiation | Worm # Studied | Experimental Replicate # | Study Date | Lifespan Percent Change Relative to Untreated <i>gas-1</i> Median | p value vs <i>gas-1</i> | p value vs N2 | NOTES      |
|---------------|---------------|-----------|------------------------------------|----------------|--------------------------|------------|-------------------------------------------------------------------|-------------------------|---------------|------------|
| Probucol      | 5 mM          | 2.7% DMSO | Dev                                | 60             | 1                        | Oct-12     | NA                                                                | NA                      | NA            | TOXIC DMSO |
|               | 5 mM          | 2.7% DMSO | YA                                 | 60             | 1                        | Oct-12     | NA                                                                | NA                      | NA            | TOXIC DMSO |
|               | 500 uM        | Ethanol   | Dev                                | 60             | 1                        | Dec-12     | 85                                                                | < 0.0001                | < 0.0001      |            |
|               | 500 uM        | Ethanol   | YA                                 | 60             | 1                        | Dec-12     | 85                                                                | 0.0869                  | < 0.0001      |            |
|               | 50 uM         | Ethanol   | Dev                                | 60             | 1                        | Mar-13     | 117                                                               | 0.0034                  | 0.3994        |            |
|               | 50 uM         | Ethanol   | YA                                 | 60             | 1                        | Mar-13     | 108                                                               | 0.0354                  | 0.0961        |            |
|               | 5 uM          | Ethanol   | Dev                                | 60             | 1                        | Mar-13     | 133                                                               | < 0.0001                | 0.4285        |            |
|               | 5 uM          | Ethanol   | YA                                 | 60             | 1                        | Mar-13     | 108                                                               | 0.0003                  | 0.894         |            |
| Rapamycin     | 2.5 uM        | Ethanol   | Dev                                | 56             | 1                        | Dec-12     | 85                                                                | < 0.0001                | < 0.0001      |            |
|               | 2.5 uM        | Ethanol   | YA                                 | 60             | 1                        | Dec-12     | 85                                                                | 0.0025                  | < 0.0001      |            |
|               | 250 nM        | Ethanol   | Dev                                | 56             | 1                        | Dec-12     | 85                                                                | 0.0157                  | < 0.0001      |            |
|               | 250 nM        | Ethanol   | YA                                 | 56             | 1                        | Dec-12     | 85                                                                | 0.0313                  | < 0.0001      |            |
|               | 25 nM         | Ethanol   | Dev                                | 56             | 1                        | Dec-12     | 100                                                               | 0.5081                  | < 0.0001      |            |
|               | 25 nM         | Ethanol   | YA                                 | 60             | 1                        | Dec-12     | 100                                                               | 0.648                   | < 0.0001      |            |
|               | 25 nM         | Ethanol   | Dev                                | 59             | 2                        | Mar-13     | 100                                                               | 0.114                   | 0.0419        |            |
|               | 25 nM         | Ethanol   | YA                                 | 58             | 2                        | Mar-13     | 92                                                                | 0.9537                  | 0.0005        |            |
|               | 2.5 nM        | Ethanol   | Dev                                | 54             | 1                        | Mar-13     | 117                                                               | 0.0151                  | 0.133         |            |
|               | 2.5 nM        | Ethanol   | YA                                 | 57             | 1                        | Mar-13     | 107                                                               | 0.0066                  | 0.1154        |            |
|               | 2.5 nM        | Ethanol   | Dev                                | 60             | 2                        | Aug-14     | 100                                                               | 0.512                   | < 0.0001      |            |
|               | 2.5 nM        | Ethanol   | YA                                 | 60             | 2                        | Aug-14     | 100                                                               | 0.0689                  | < 0.0001      |            |
|               | 2.5 nM        | Ethanol   | YA                                 | 60             | 3                        | Sep-14     | 100                                                               | 0.7236                  | < 0.0001      |            |
| 250 pM        | Ethanol       | Dev       | 60                                 | 1              | Sep-14                   | 82         | 0.0096                                                            | < 0.0001                |               |            |
| Cycloheximide | 2.5 uM        | Water     | Dev                                | 60             | 1                        | Jul-14     | 82                                                                | 0.0006                  | < 0.0001      |            |
|               | 2.5 uM        | Water     | YA                                 | 60             | 1                        | Aug-14     | 100                                                               | 0.1294                  | < 0.0001      |            |
|               | 250 nM        | Water     | YA                                 | 60             | 1                        | Aug-14     | 100                                                               | 0.8881                  | < 0.0001      |            |
|               | 250 nM        | Water     | YA                                 | 60             | 2                        | Sep-14     | 100                                                               | 0.4995                  | < 0.0001      |            |
|               | 25 nM         | Water     | YA                                 | 60             | 1                        | Aug-14     | 118                                                               | 0.3689                  | < 0.0001      |            |
|               | 25 nM         | Water     | Dev                                | 60             | 1                        | Sep-14     | 100                                                               | 0.7099                  | < 0.0001      |            |

\*Dev, Development; YA, young adult day 1

**Fig S2. Probucol effects on lifespan of *C. elegans gas-1(fc21)* CI deficient worms**

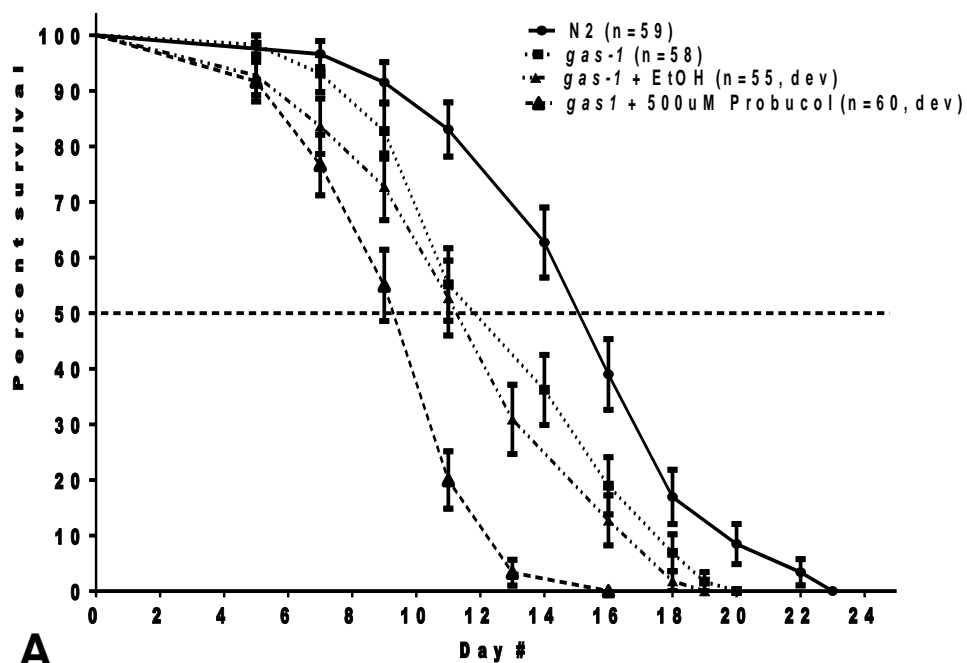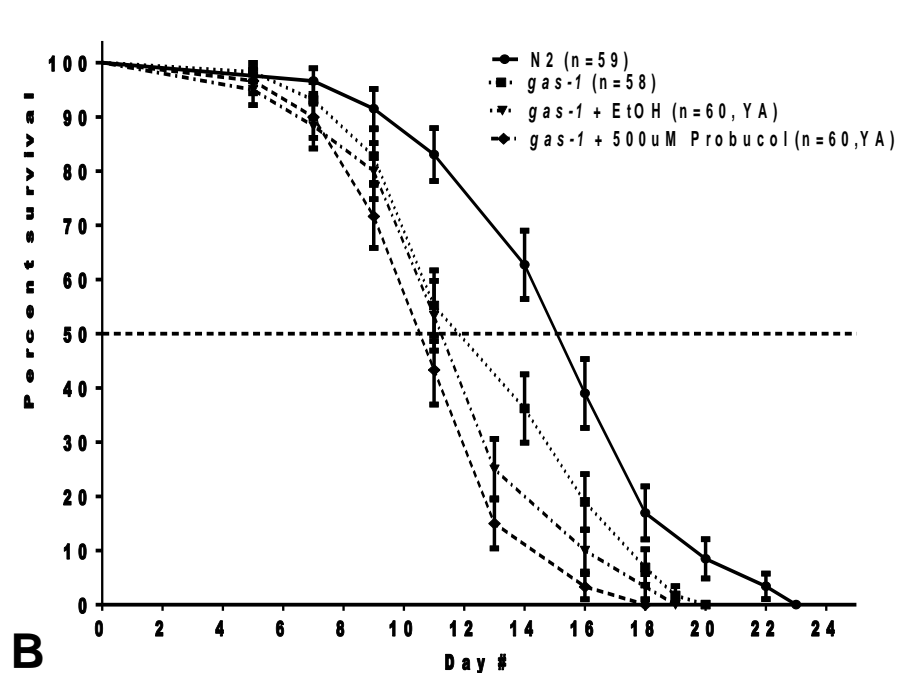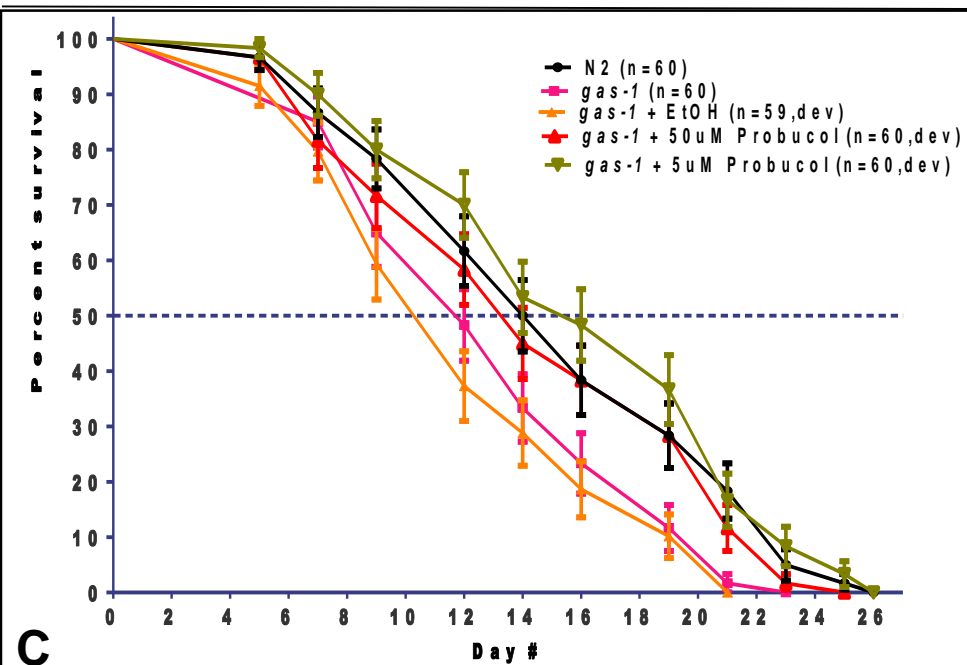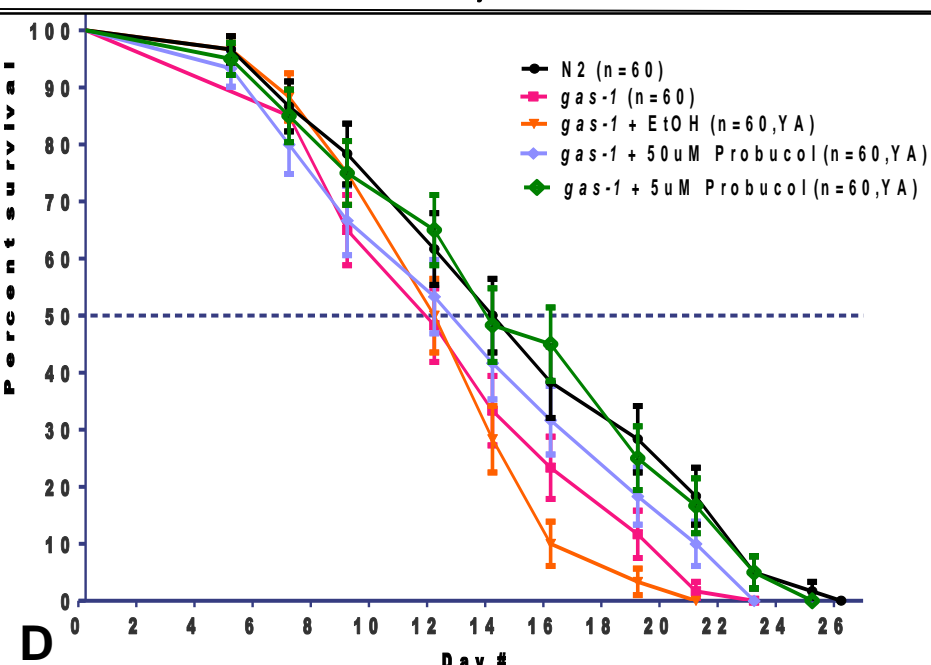

**Fig S3. Rapamycin effects on lifespan of *C. elegans gas-1(fc21)* CI deficient worms**

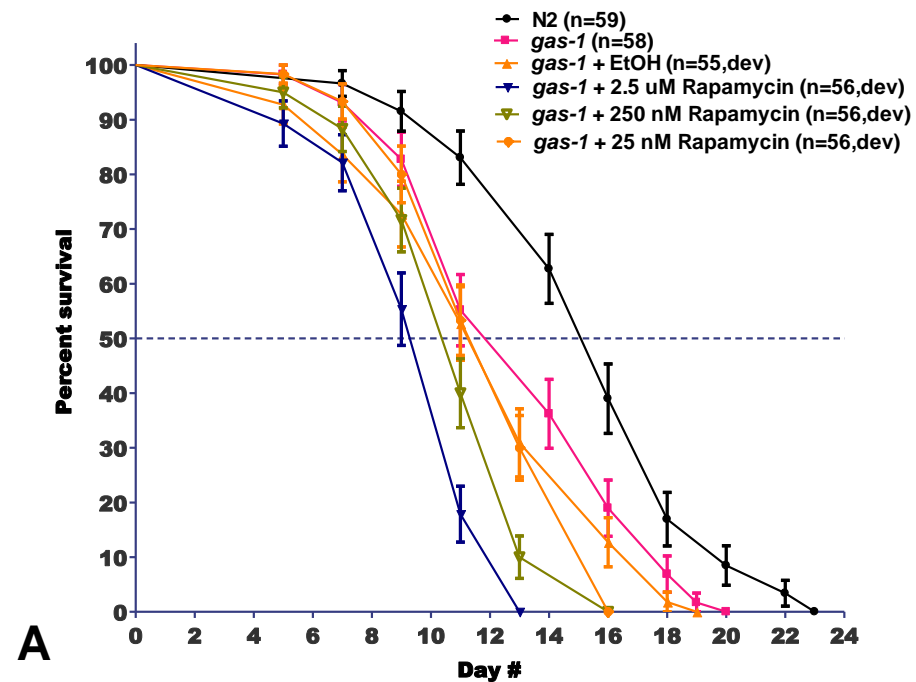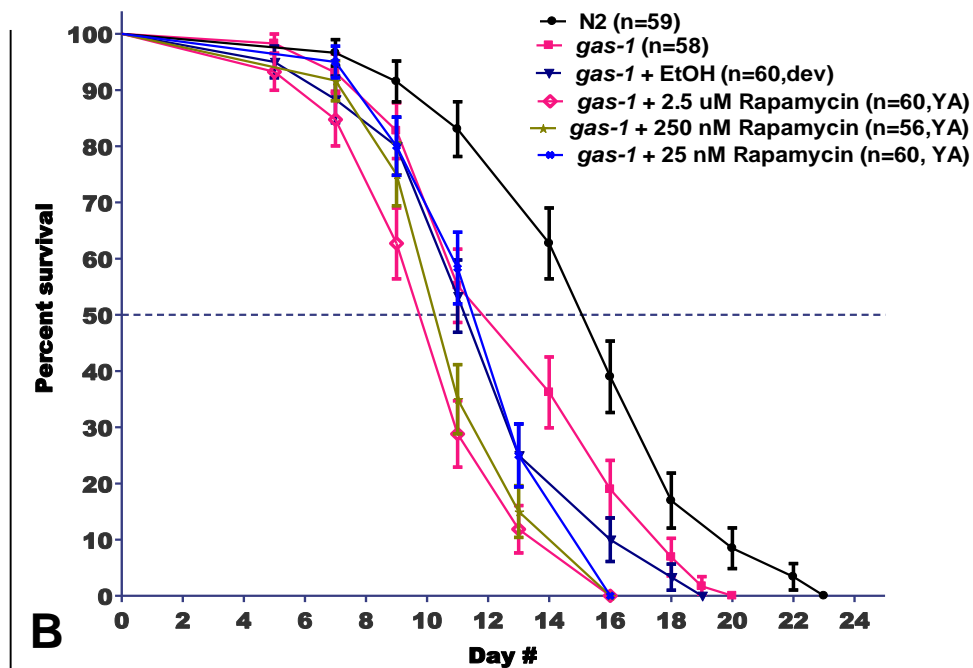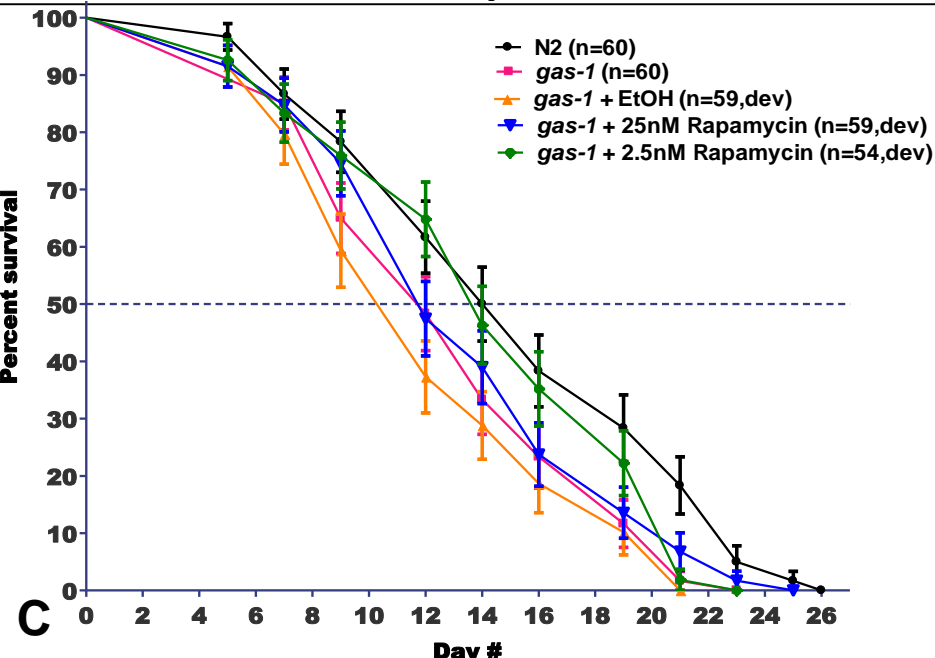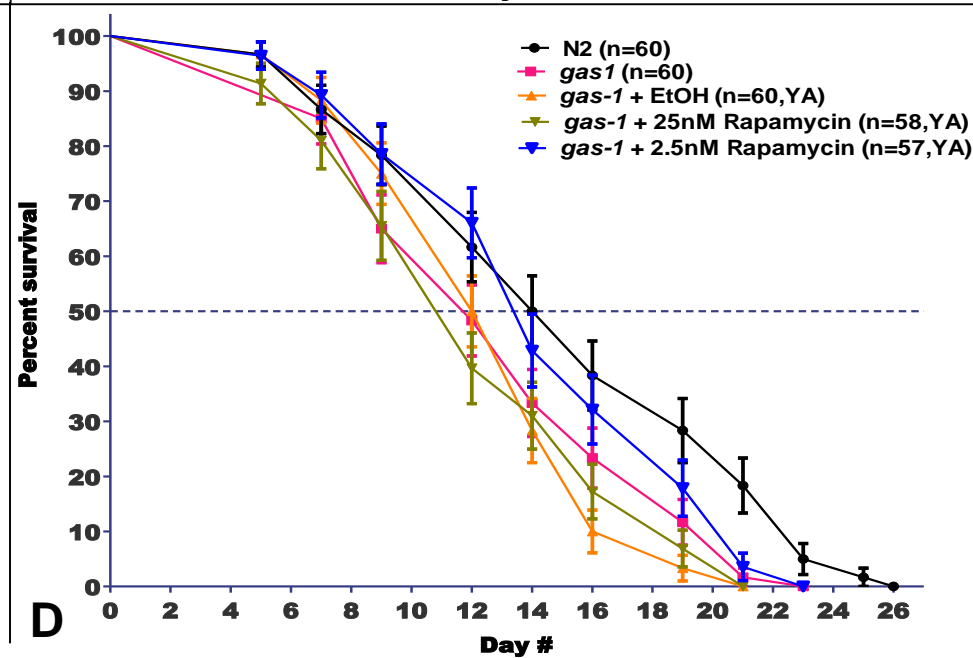

**Fig S4. Cycloheximide effects on *C. elegans* lifespan of *gas-1(fc21)* CI deficient worms**

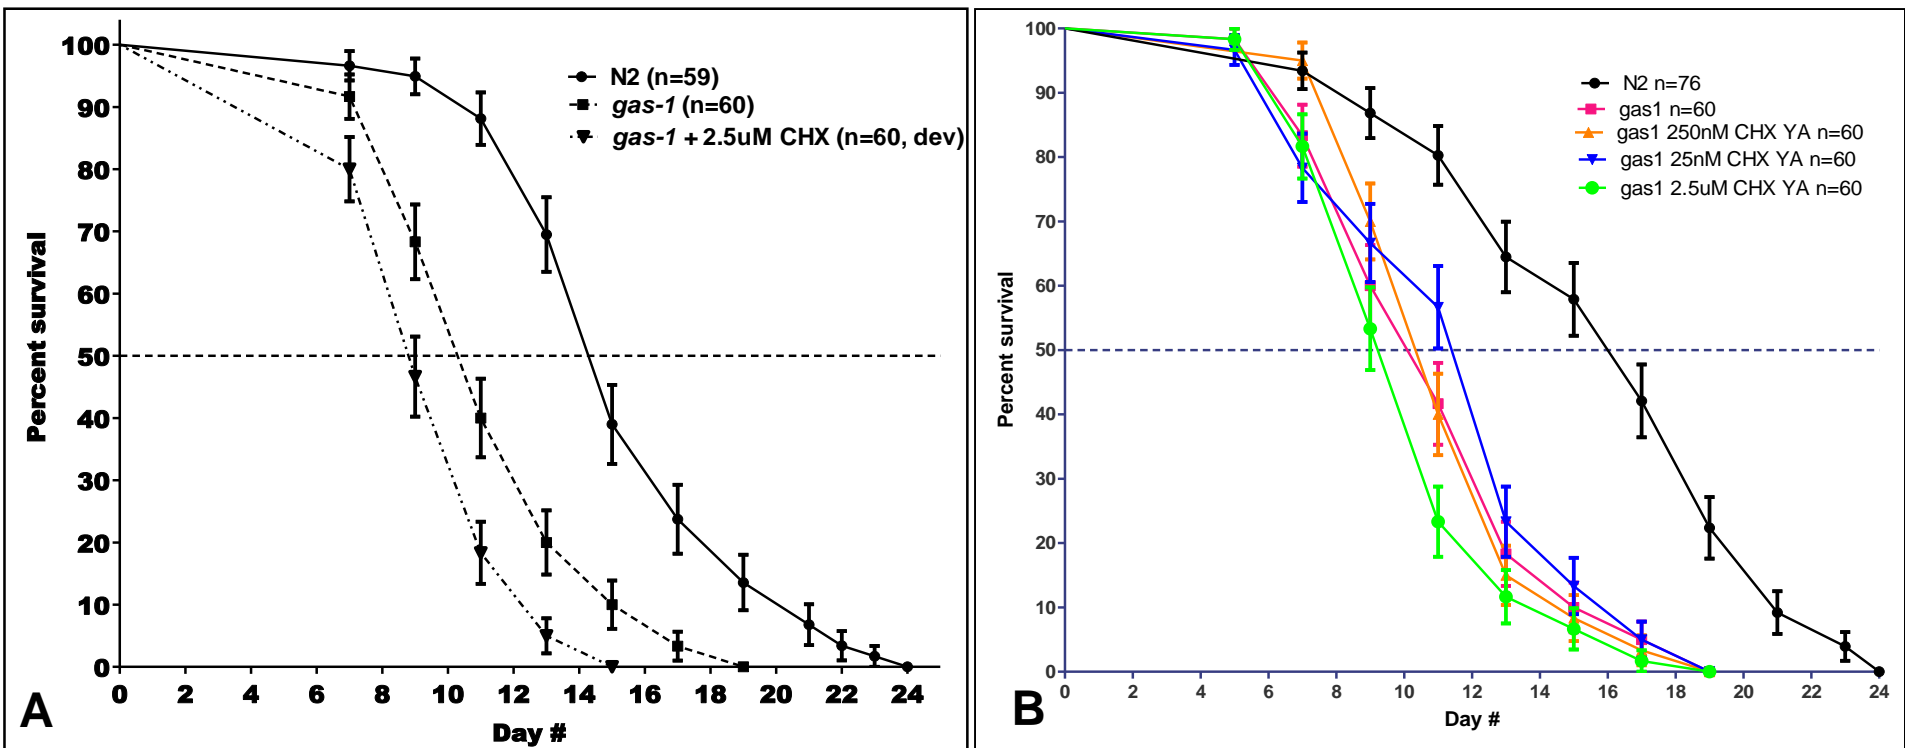

**Fig S5. Cytosolic translation activity effects in human podocytes.**

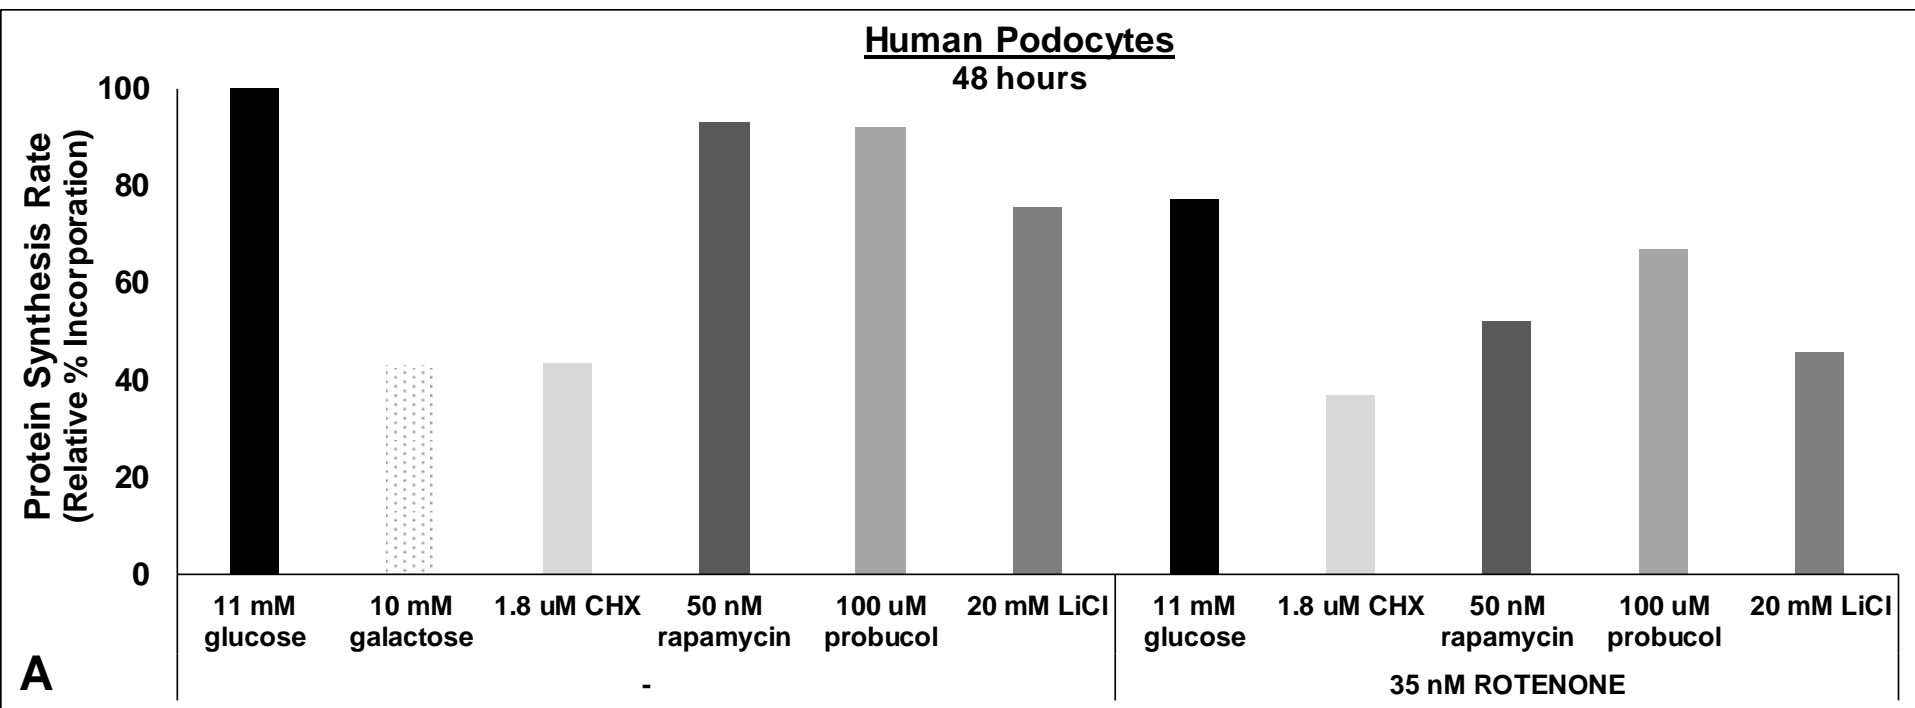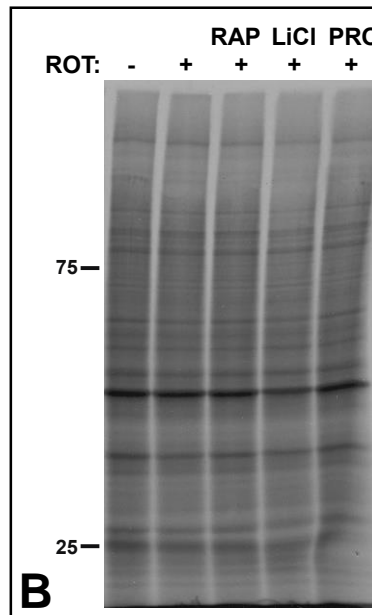

**Fig S6. Cycloheximide effects in CIII (Antimycin A) or CV (oligomycin) inhibition & in CI-III (FBXL4) disease**

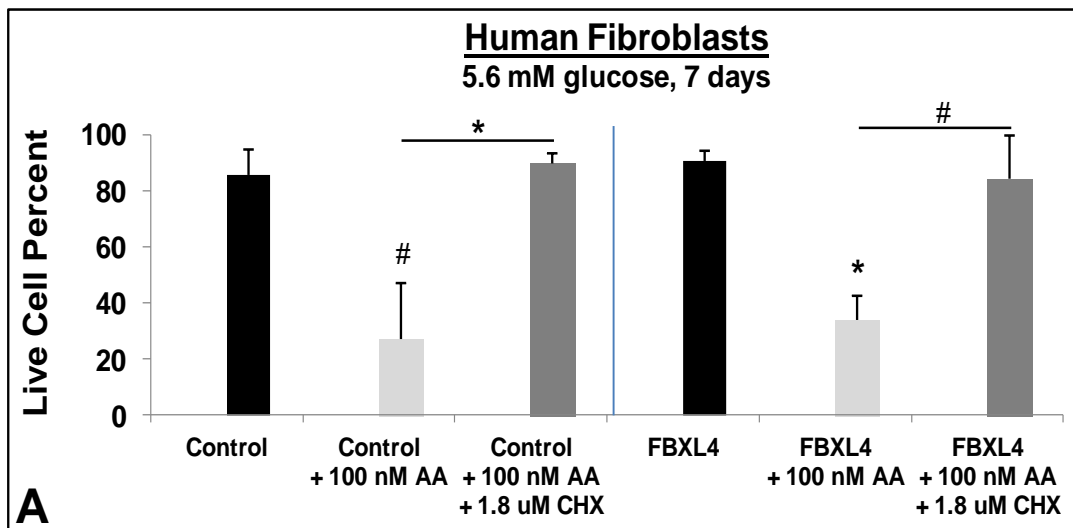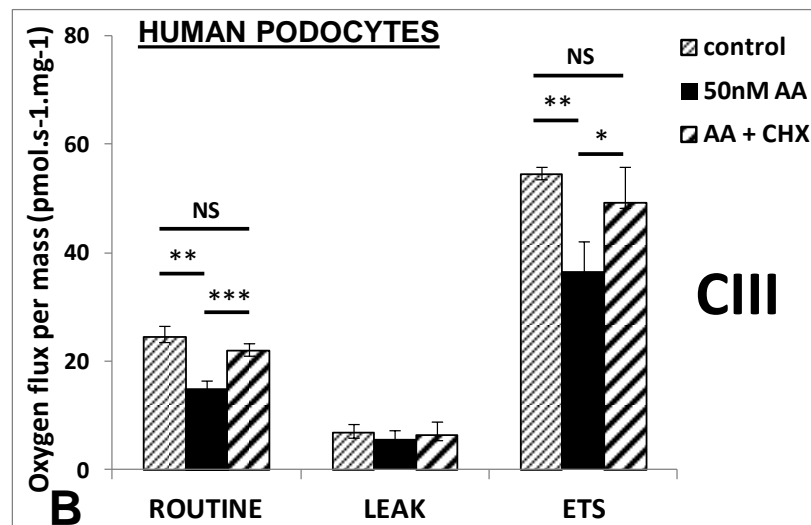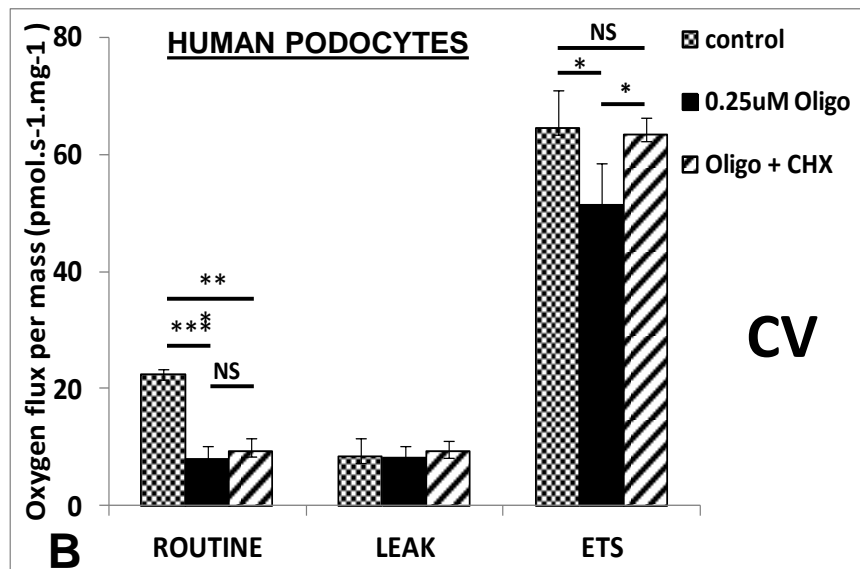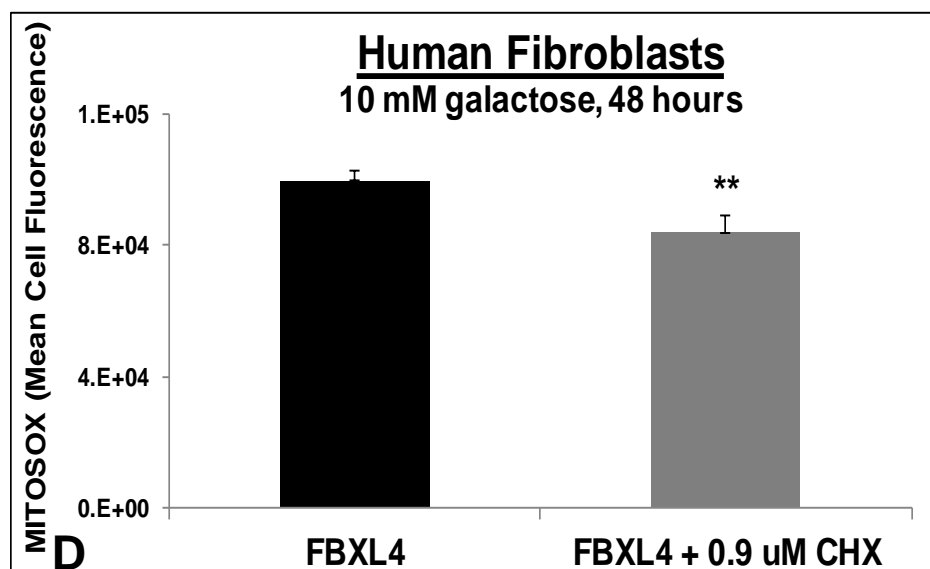



**Fig S7. Cycloheximide effects on mitochondrial physiology in human cells with pharmacologic or genetic based RC deficiencies.**

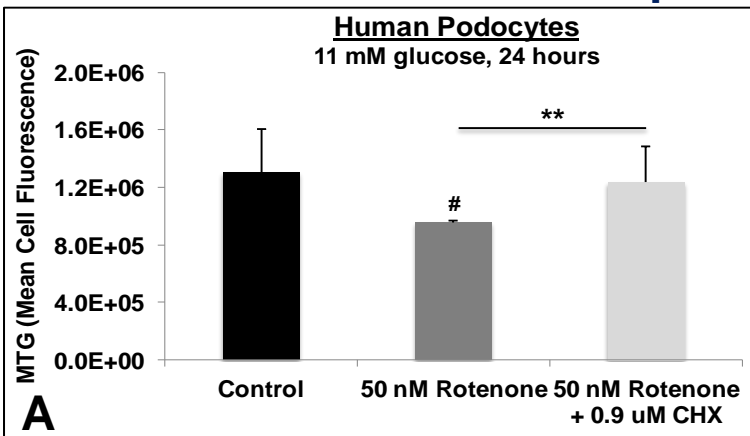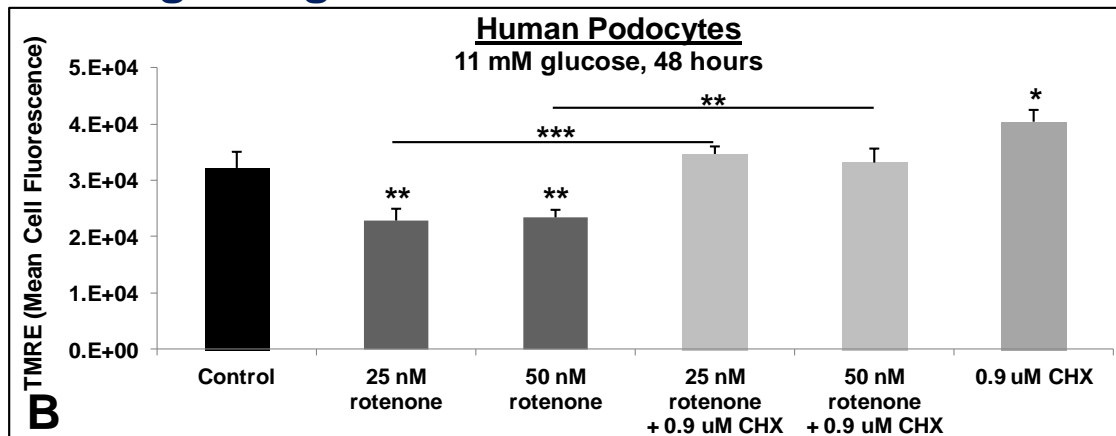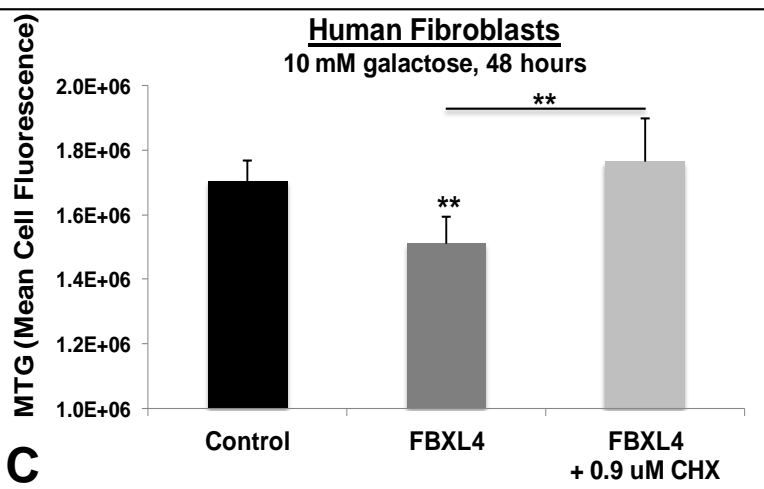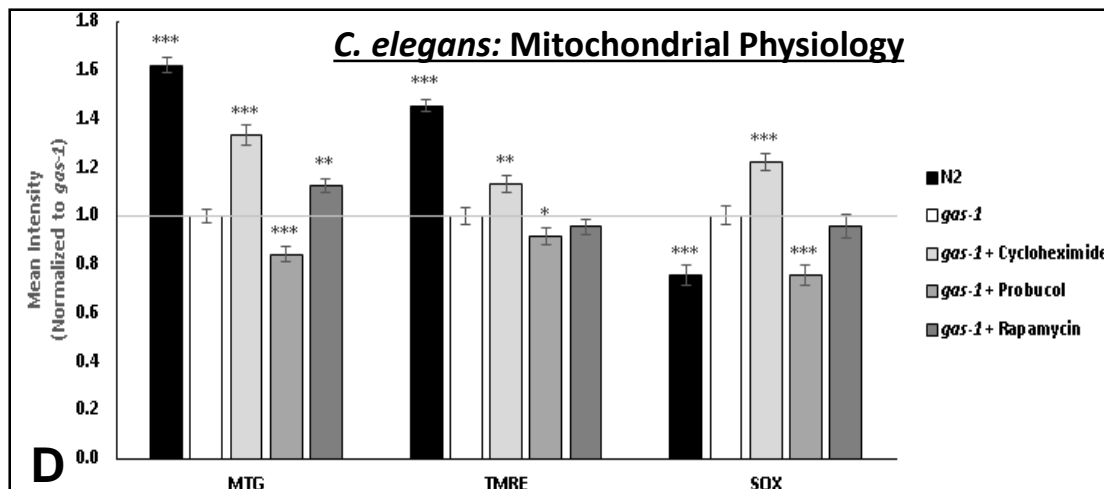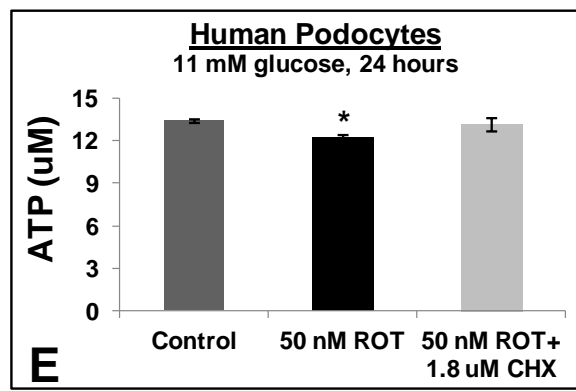

# Fig S8. Apoptosis is induced only by high-dose, short-duration rotenone

|                               |   |      |     |     |   |    |    |     |                        |
|-------------------------------|---|------|-----|-----|---|----|----|-----|------------------------|
|                               |   |      |     |     |   |    |    |     | <b>Human Podocytes</b> |
|                               |   |      |     |     |   |    |    |     | <b>11 mM glucose</b>   |
| <b>Time (hours)</b>           | - | 24   | 24  | 6   | 6 | 24 | 6  | 6   |                        |
| <b>Hydrogen Peroxide (mM)</b> | - | -    | -   | -   | - | 1  | 10 | 100 |                        |
| <b>Rotenone (uM)</b>          | - | 0.05 | 0.1 | 0.5 | 1 | -  | -  | -   |                        |

Cleaved CASP9 (37 kDa)

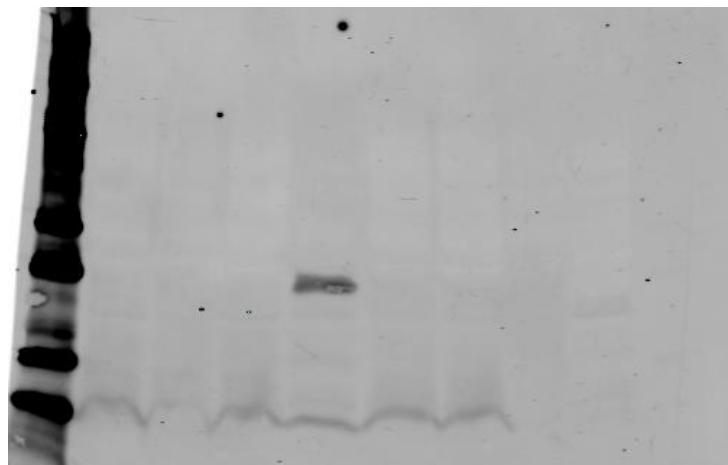

Cleaved PARP (89 kDa)

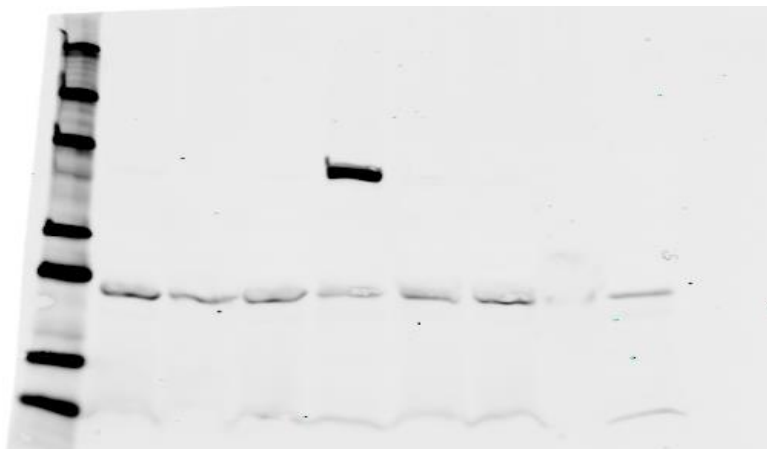

**Fig S9. Mitophagy is activated in *FBXL4* deficient patient fibroblasts with RC complex I-III dysfunction.**

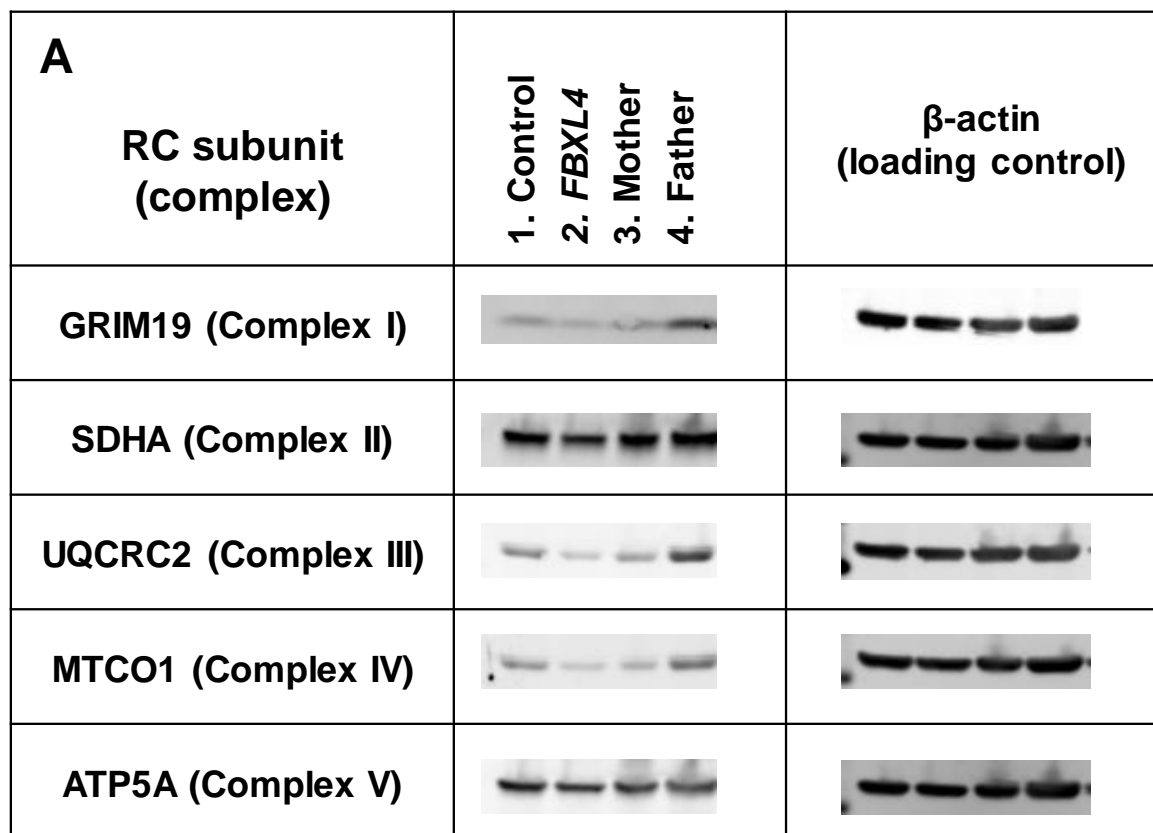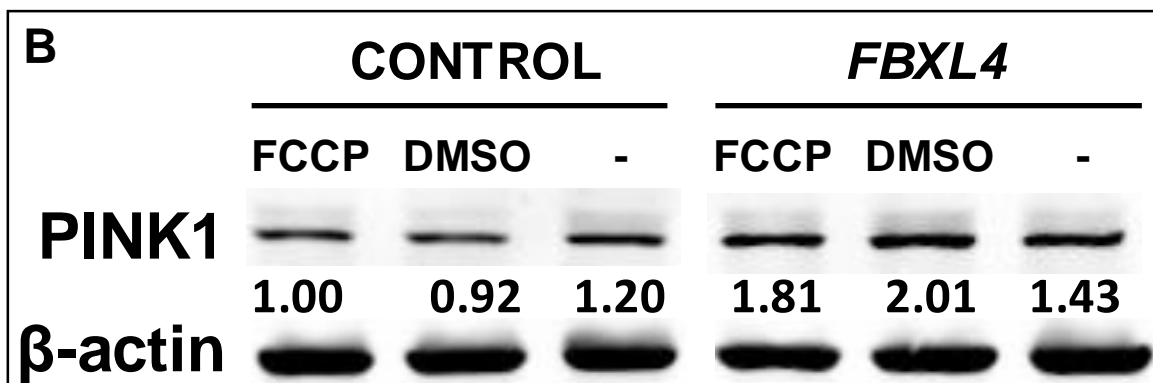

**Fig S10. Chloramphenicol effects on cell viability with RC inhibition and therapies**

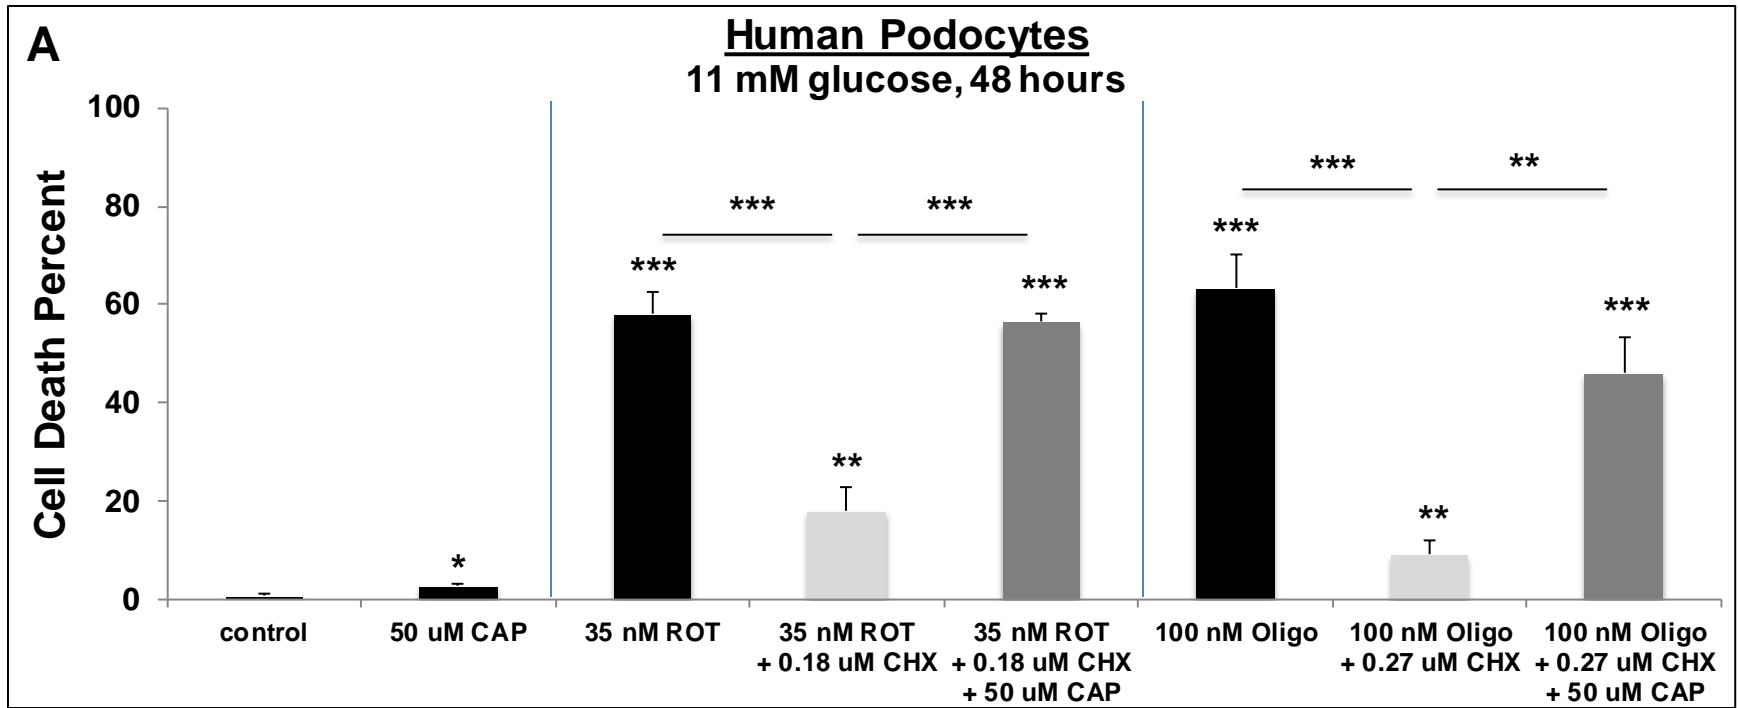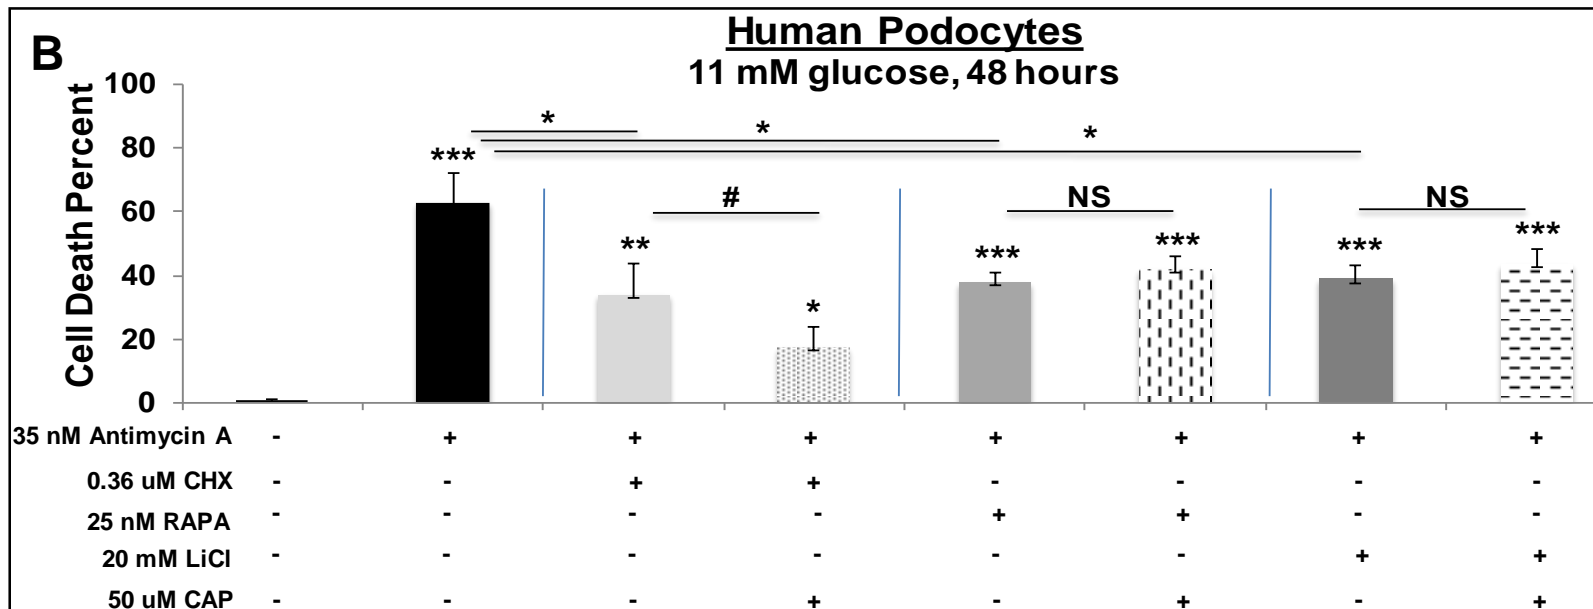

**Fig S11. Long-term (24-48 hours) mitochondrial RC inhibition activates the ER stress response (GRP78 and PERK) in human podocytes and is prevented by cycloheximide.**

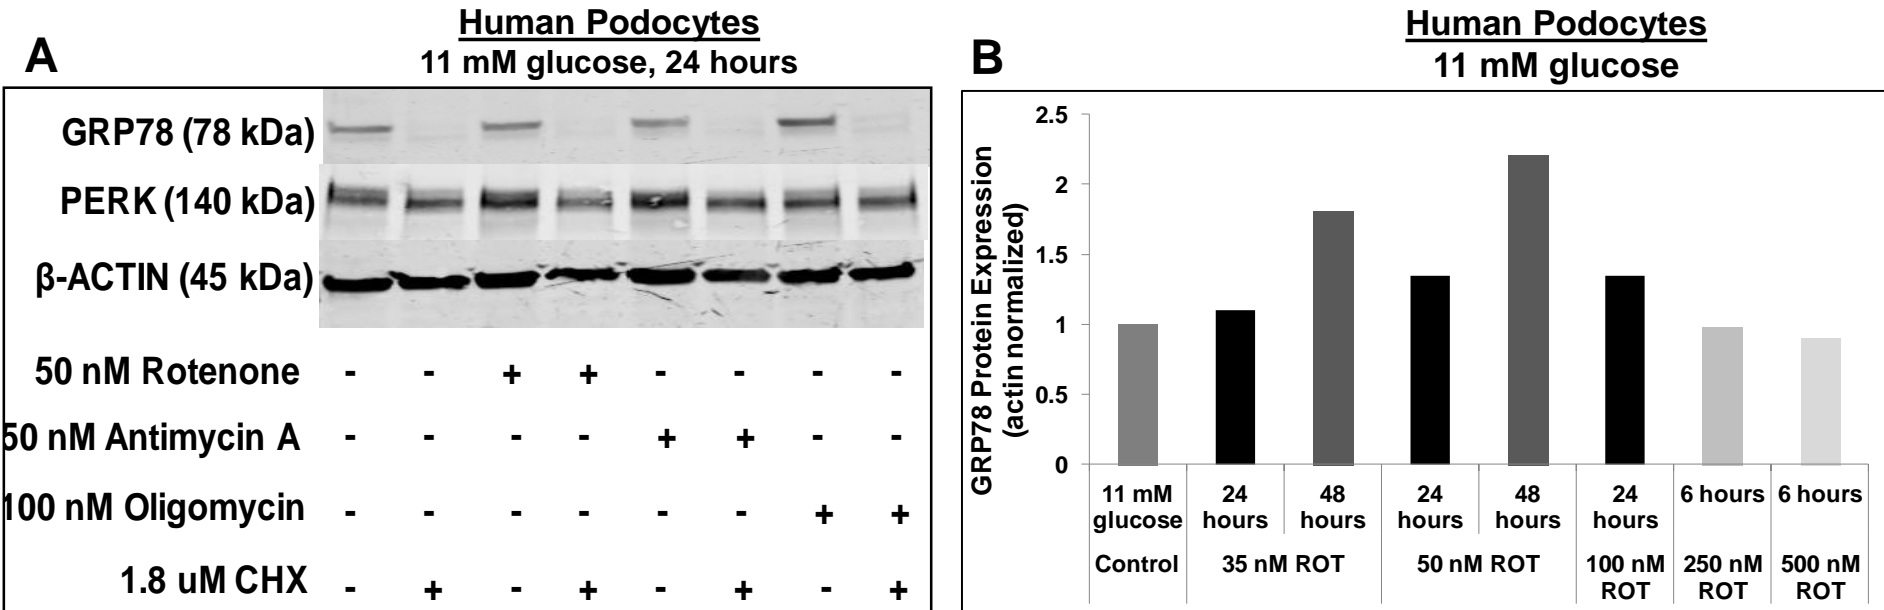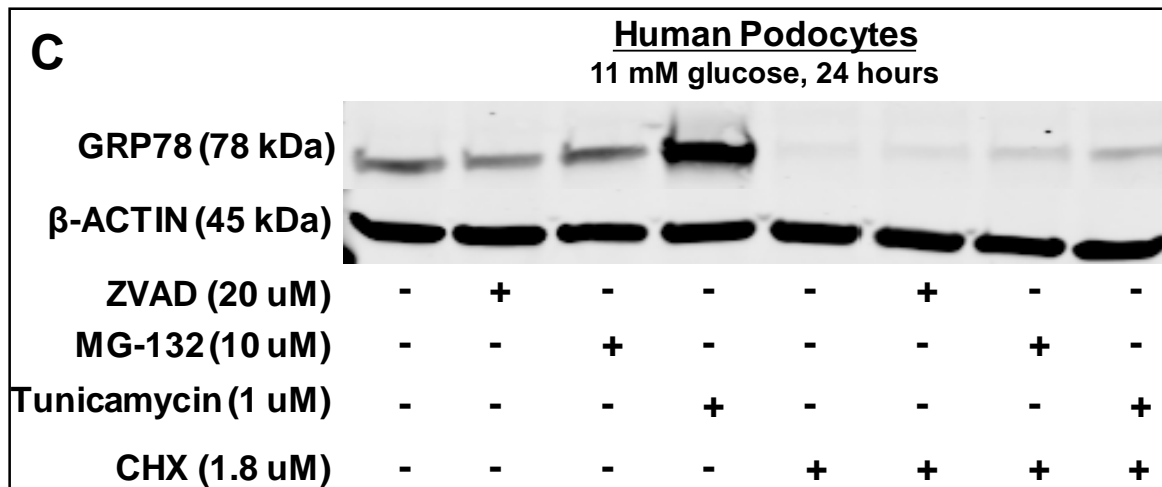

**Fig S12. Short-term mitochondrial RC inhibition induces the ER stress response (PERK and phosphor-EIF2 $\alpha$ ) in human podocytes.**

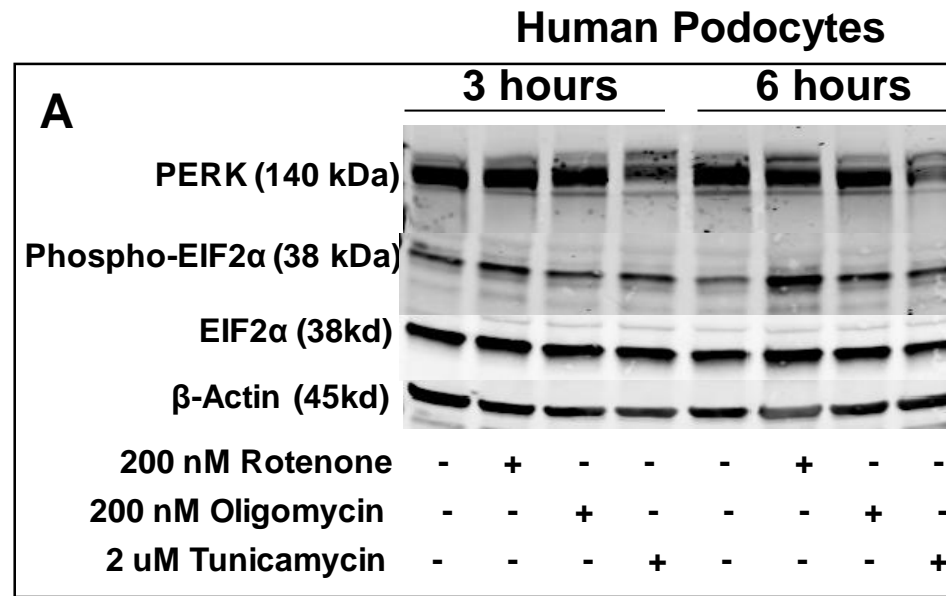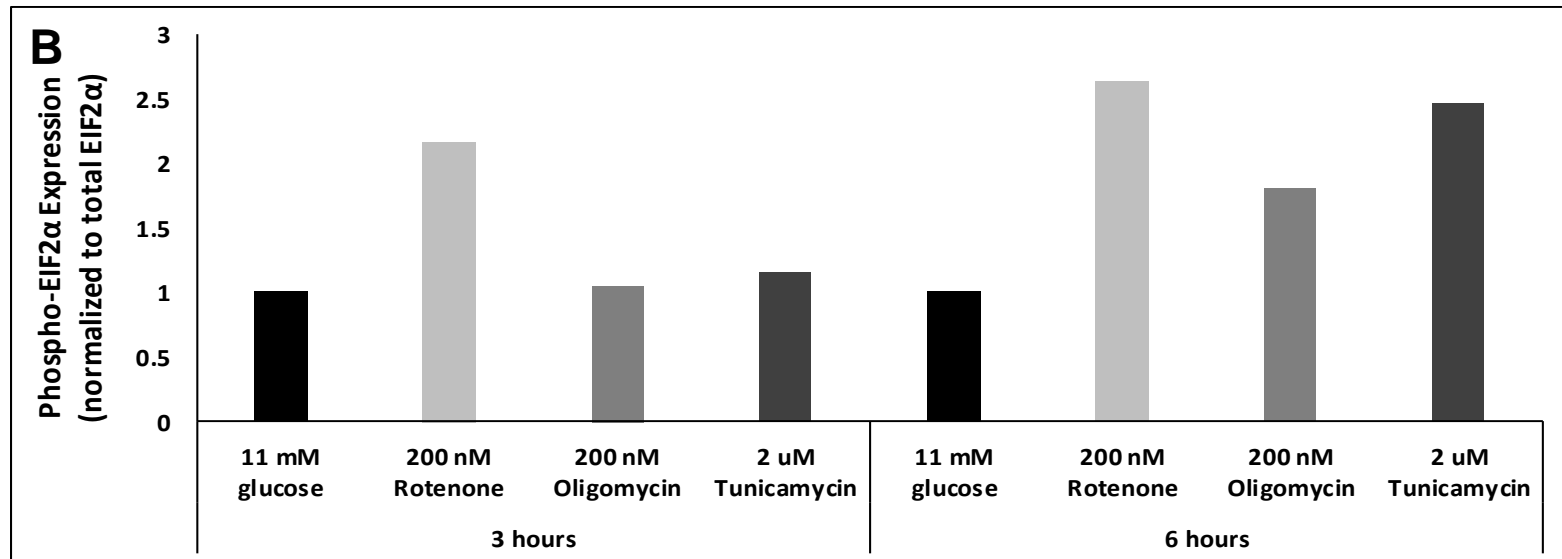

**Fig S13. Gene expression profiling in *C. elegans gas-1(fc21)* adult worms following 24 treatment with (A) 5  $\mu$ M probucol and (B-C) 2.5  $\mu$ M cycloheximide**

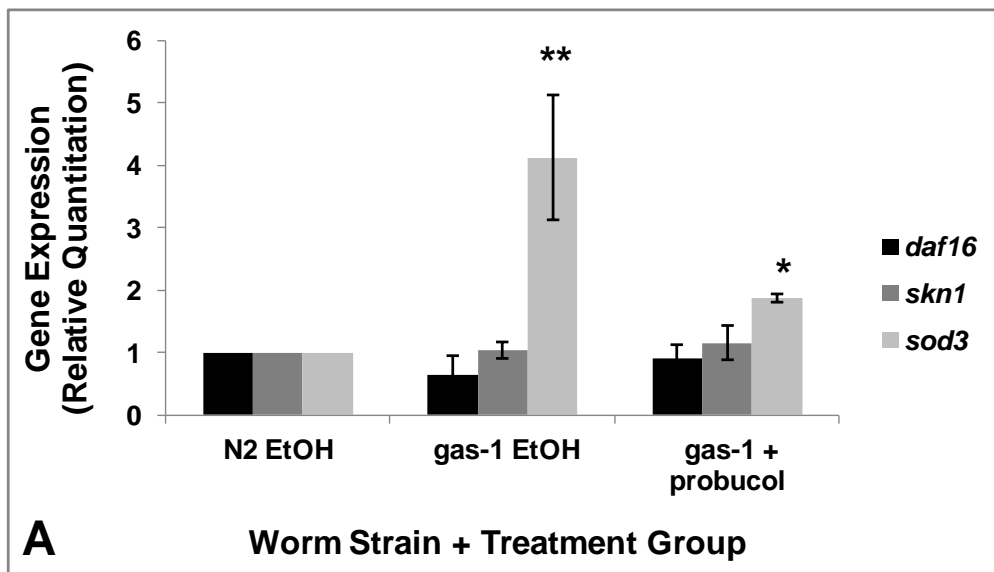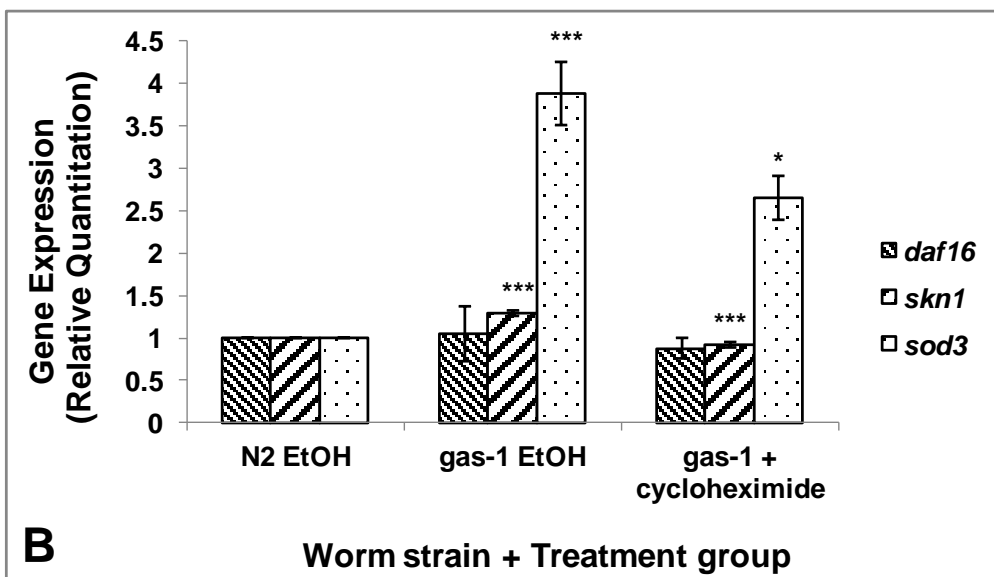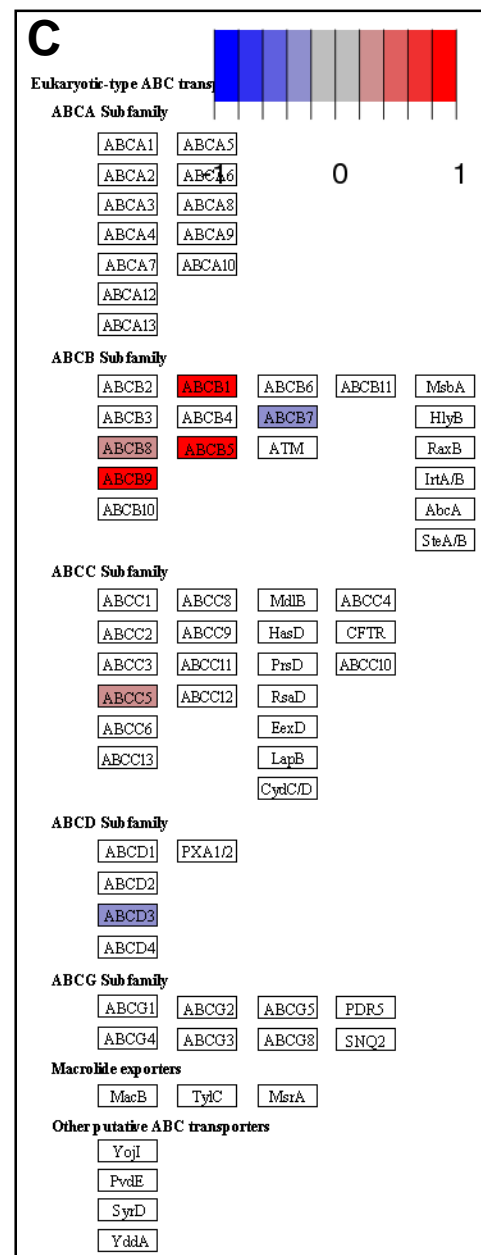

# Fig S14. Pathway-level RNAseq transcriptome effects of treating *C. elegans gas-1(fc21)* mutant adult worms with cycloheximide, probucol or rapamycin.

## A Cycloheximide effects in *gas-1(fc21)*

| UPREGULATED by CHX in <i>gas-1</i> | KEGG Pathway ID | # Genes Total | #Genes Measured | Enrichment Score (ES) | P Value  | FDR    | KEGG Pathway Name                           |
|------------------------------------|-----------------|---------------|-----------------|-----------------------|----------|--------|---------------------------------------------|
| 1                                  | cel02010        | 16            | 16              | 2.03                  | 7.85E-05 | 0.71%  | ABC transporters                            |
| 2                                  | cel03010        | 142           | 115             | 1.61                  | 9.49E-04 | 4.27%  | Ribosome                                    |
| 3                                  | cel04350        | 34            | 32              | 1.5                   | 1.86E-03 | 5.57%  | TGF-beta signaling pathway                  |
| 4                                  | cel04310        | 58            | 56              | 1.26                  | 6.57E-03 | 14.78% | Wnt signaling pathway                       |
| 5                                  | cel04141        | 124           | 119             | 0.81                  | 5.56E-02 | 92.23% | Protein processing in endoplasmic reticulum |
| 6                                  | cel03030        | 32            | 30              | 0.76                  | 6.75E-02 | 92.23% | DNA replication                             |
| 7                                  | cel00350        | 22            | 21              | 0.73                  | 7.67E-02 | 92.23% | Tyrosine metabolism                         |
| 8                                  | cel03040        | 106           | 102             | 0.65                  | 1.05E-01 | 92.23% | Spliceosome                                 |
| 9                                  | cel03060        | 21            | 20              | 0.63                  | 1.12E-01 | 92.23% | Protein export                              |
| 10                                 | cel03008        | 79            | 58              | 0.61                  | 1.17E-01 | 92.23% | Ribosome biogenesis in eukaryotes           |
| 11                                 | cel03018        | 44            | 43              | 0.54                  | 1.48E-01 | 92.23% | RNA degradation                             |
| 12                                 | cel00970        | 113           | 32              | 0.48                  | 1.76E-01 | 92.23% | Aminoacyl-tRNA biosynthesis                 |
| 13                                 | cel00590        | 13            | 13              | 0.45                  | 1.90E-01 | 92.23% | Arachidonic acid metabolism                 |
| 14                                 | cel00600        | 25            | 24              | 0.44                  | 1.96E-01 | 92.23% | Sphingolipid metabolism                     |
| 15                                 | cel04145        | 56            | 55              | 0.38                  | 2.28E-01 | 92.23% | Phagosome                                   |

  

| DOWNREGULATED by CHX in <i>gas-1</i> | KEGG Pathway ID | # Genes Total | #Genes Measured | Enrichment Score (ES) | P Value  | FDR    | KEGG Pathway Name                           |
|--------------------------------------|-----------------|---------------|-----------------|-----------------------|----------|--------|---------------------------------------------|
| 1                                    | cel01040        | 15            | 14              | -1.78                 | 4.03E-04 | 3.62%  | Biosynthesis of unsaturated fatty acids     |
| 2                                    | cel00190        | 111           | 98              | -1.14                 | 1.31E-02 | 59.02% | Oxidative phosphorylation                   |
| 3                                    | cel00520        | 32            | 30              | -1.06                 | 1.99E-02 | 59.66% | Amino sugar and nucleotide sugar metabolism |
| 4                                    | cel04146        | 60            | 59              | -0.95                 | 3.09E-02 | 59.66% | Peroxisome                                  |
| 5                                    | cel00450        | 11            | 10              | -0.93                 | 3.96E-02 | 59.66% | Selenocompound metabolism                   |
| 6                                    | cel00051        | 23            | 22              | -0.87                 | 4.28E-02 | 59.66% | Fructose and mannose metabolism             |
| 7                                    | cel00500        | 26            | 25              | -0.87                 | 4.64E-02 | 59.66% | Starch and sucrose metabolism               |
| 8                                    | cel00380        | 29            | 27              | -0.79                 | 6.19E-02 | 62.71% | Tryptophan metabolism                       |
| 9                                    | cel04140        | 15            | 15              | -0.8                  | 6.27E-02 | 62.71% | Regulation of autophagy                     |
| 10                                   | cel00062        | 15            | 14              | -0.72                 | 8.20E-02 | 70.21% | Fatty acid elongation                       |
| 11                                   | cel04020        | 37            | 37              | -0.68                 | 9.09E-02 | 70.21% | Calcium signaling pathway                   |
| 12                                   | cel00260        | 26            | 26              | -0.68                 | 9.36E-02 | 70.21% | Glycine, serine and threonine metabolism    |

## C Rapamycin effects in *gas-1(fc21)*

| UPREGULATED by RAPA in <i>gas-1</i> | KEGG Pathway ID | # Genes Total | #Genes Measured | Enrichment Score (ES) | P Value  | FDR    | KEGG Pathway Name           |
|-------------------------------------|-----------------|---------------|-----------------|-----------------------|----------|--------|-----------------------------|
| 1                                   | cel04145        | 56            | 55              | 0.93                  | 3.33E-02 | 97.55% | Phagosome                   |
| 2                                   | cel03050        | 38            | 37              | 0.72                  | 7.87E-02 | 97.55% | Proteasome                  |
| 3                                   | cel00590        | 13            | 13              | 0.71                  | 8.40E-02 | 97.55% | Arachidonic acid metabolism |

  

| DOWNREGULATED by RAPA in <i>gas-1</i> | KEGG Pathway ID | # Genes Total | #Genes Measured | Enrichment Score (ES) | P Value  | FDR    | KEGG Pathway Name                            |
|---------------------------------------|-----------------|---------------|-----------------|-----------------------|----------|--------|----------------------------------------------|
| 1                                     | cel00982        | 36            | 35              | -1.29                 | 6.27E-03 | 56.39% | Drug metabolism - cytochrome P450            |
| 2                                     | cel03020        | 24            | 23              | -0.93                 | 3.54E-02 | 61.93% | RNA polymerase                               |
| 3                                     | cel03010        | 142           | 115             | -0.87                 | 4.31E-02 | 61.93% | Ribosome                                     |
| 4                                     | cel04120        | 77            | 73              | -0.87                 | 4.45E-02 | 61.93% | Ubiquitin mediated proteolysis               |
| 5                                     | cel04080        | 24            | 24              | -0.83                 | 5.13E-02 | 61.93% | Neuroactive ligand-receptor interaction      |
| 6                                     | cel04140        | 15            | 15              | -0.81                 | 6.13E-02 | 61.93% | Regulation of autophagy                      |
| 7                                     | cel00040        | 20            | 19              | -0.78                 | 6.48E-02 | 61.93% | Pentose and glucuronate interconversions     |
| 8                                     | cel00450        | 11            | 10              | -0.78                 | 6.83E-02 | 61.93% | Selenocompound metabolism                    |
| 9                                     | cel04310        | 58            | 56              | -0.75                 | 7.38E-02 | 61.93% | Wnt signaling pathway                        |
| 10                                    | cel04020        | 37            | 37              | -0.73                 | 7.56E-02 | 61.93% | Calcium signaling pathway                    |
| 11                                    | cel00980        | 32            | 31              | -0.7                  | 8.71E-02 | 61.93% | Metabolism of xenobiotics by cytochrome P450 |
| 12                                    | cel03040        | 106           | 102             | -0.67                 | 9.35E-02 | 61.93% | Spliceosome                                  |

## D Consistent pathway-level effects in *gas-1(fc21)* by all 3 drugs (depicted for Probuclol)

## B Probuclol effects in *gas-1(fc21)*

| UPREGULATED by Probuclol in <i>gas-1</i> | KEGG Pathway ID | # Genes Total | #Genes Measured | Enrichment Score (ES) | P Value  | FDR    | KEGG Pathway Name                         |
|------------------------------------------|-----------------|---------------|-----------------|-----------------------|----------|--------|-------------------------------------------|
| 1                                        | cel04145        | 56            | 55              | 1.55                  | 1.36E-03 | 12.23% | Phagosome                                 |
| 2                                        | cel03022        | 33            | 32              | 0.84                  | 5.13E-02 | 97.95% | Basal transcription factors               |
| 3                                        | cel03030        | 32            | 30              | 0.79                  | 6.10E-02 | 97.95% | DNA replication                           |
| 4                                        | cel04130        | 23            | 23              | 0.74                  | 7.61E-02 | 97.95% | SNARE interactions in vesicular transport |
| 5                                        | cel00590        | 13            | 13              | 0.74                  | 8.16E-02 | 97.95% | Arachidonic acid metabolism               |
| 6                                        | cel03018        | 44            | 43              | 0.71                  | 8.39E-02 | 97.95% | RNA degradation                           |
| 7                                        | cel03040        | 33            | 33              | 0.69                  | 8.92E-02 | 97.95% | Nucleotide excision repair                |
| 8                                        | cel00770        | 11            | 11              | 0.71                  | 9.18E-02 | 97.95% | Pantothenate and CoA biosynthesis         |

  

| DOWNREGULATED by Probuclol in <i>gas-1</i> | KEGG Pathway ID | # Genes Total | #Genes Measured | Enrichment Score (ES) | P Value  | FDR    | KEGG Pathway Name                            |
|--------------------------------------------|-----------------|---------------|-----------------|-----------------------|----------|--------|----------------------------------------------|
| 1                                          | cel00982        | 36            | 35              | -2.15                 | 1.88E-05 | 0.17%  | Drug metabolism - cytochrome P450            |
| 2                                          | cel00071        | 44            | 41              | -1.58                 | 9.86E-04 | 4.44%  | Fatty acid degradation                       |
| 3                                          | cel00980        | 32            | 31              | -1.39                 | 3.94E-03 | 8.11%  | Metabolism of xenobiotics by cytochrome P450 |
| 4                                          | cel04020        | 37            | 37              | -1.34                 | 3.98E-03 | 8.11%  | Calcium signaling pathway                    |
| 5                                          | cel00062        | 15            | 14              | -1.42                 | 4.50E-03 | 8.11%  | Fatty acid elongation                        |
| 6                                          | cel01040        | 15            | 14              | -1.34                 | 6.41E-03 | 8.53%  | Biosynthesis of unsaturated fatty acids      |
| 7                                          | cel00061        | 13            | 12              | -1.29                 | 6.63E-03 | 8.53%  | Fatty acid biosynthesis                      |
| 8                                          | cel04146        | 60            | 59              | -1.23                 | 8.69E-03 | 9.78%  | Peroxisome                                   |
| 9                                          | cel00900        | 15            | 13              | -1.23                 | 1.12E-02 | 11.20% | Terpenoid backbone biosynthesis              |
| 10                                         | cel00830        | 18            | 18              | -1.16                 | 1.38E-02 | 12.38% | Retinol metabolism                           |
| 11                                         | cel00350        | 22            | 21              | -1.04                 | 2.29E-02 | 18.70% | Tyrosine metabolism                          |
| 12                                         | cel00650        | 20            | 19              | -1.01                 | 2.71E-02 | 20.29% | Butanoate metabolism                         |
| 13                                         | cel00040        | 20            | 19              | -1                    | 3.03E-02 | 20.96% | Pentose and glucuronate interconversions     |
| 14                                         | cel00051        | 23            | 22              | -0.91                 | 3.80E-02 | 23.12% | Fructose and mannose metabolism              |
| 15                                         | cel04122        | 12            | 11              | -0.93                 | 3.85E-02 | 23.12% | Sulfur relay system                          |
| 16                                         | cel00010        | 39            | 33              | -0.9                  | 4.46E-02 | 23.63% | Glycolysis / Gluconeogenesis                 |
| 17                                         | cel04140        | 15            | 15              | -0.9                  | 4.46E-02 | 23.63% | Regulation of autophagy                      |
| 18                                         | cel00500        | 26            | 25              | -0.83                 | 5.90E-02 | 29.50% | Starch and sucrose metabolism                |
| 19                                         | cel00020        | 33            | 31              | -0.79                 | 6.59E-02 | 31.21% | Citrate cycle (TCA cycle)                    |
| 20                                         | cel04010        | 64            | 62              | -0.71                 | 8.06E-02 | 36.29% | MAPK signaling pathway                       |
| 21                                         | cel00380        | 29            | 27              | -0.68                 | 9.36E-02 | 36.82% | Tryptophan metabolism                        |
| 22                                         | cel00280        | 40            | 38              | -0.69                 | 9.38E-02 | 36.82% | Valine, leucine and isoleucine degradation   |
| 23                                         | cel00920        | 14            | 14              | -0.68                 | 9.41E-02 | 36.82% | Sulfur metabolism                            |

## 'PHAGOSOME' UPREGULATION

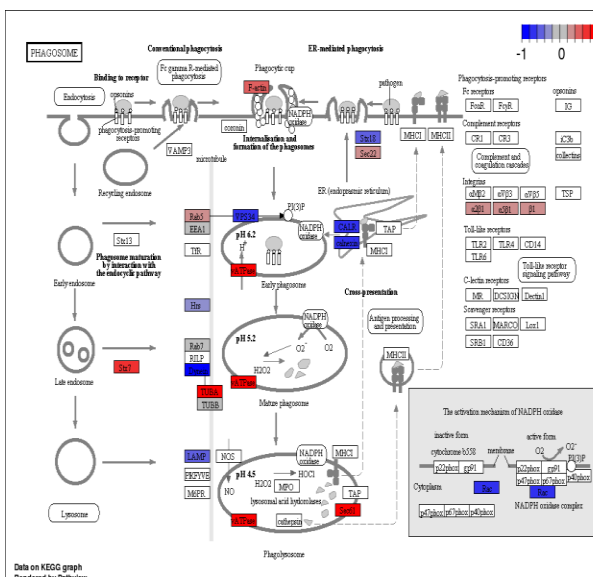

## 'REGULATION OF AUTOPHAGY' DOWNREGULATION

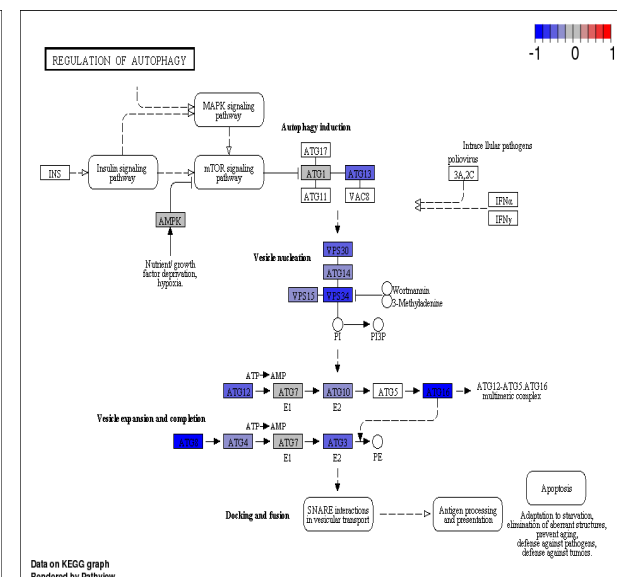

Supplement: supp_ddv207_ddv207supp_data.pdf [file supp_ddv207_ddv207supp_data.pdf]
